# Supplementary material for: Gaucher-like Cells in Thalassemia Intermedia: Is It a Challenge?
Source: MDPI journal article supplement (doi:10.3390/diseases11040161), 2023-11-06

**Figure S1.** Gaucher cells in bone marrow smear with May Grunwald-Giemsa (MGG) stain x 100  
(from authors' records)

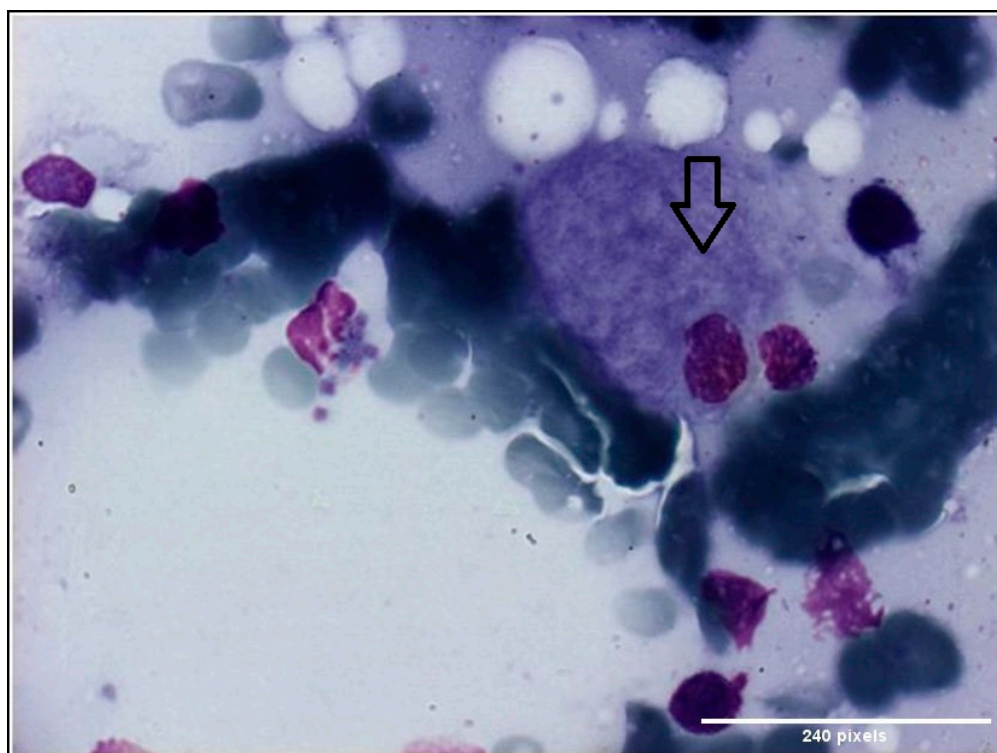

Supplement: s1 [file s1]
